# Supplementary material
Source: publisher figshare collection journal article supplement (https://geolsoc.figshare.com/ndownloader/files/16124822)
Supplement: Supplementary file 1 [file 16124822]

## Sheet: samples DUNKLEY JGS App. 2
Sample	Symbol	SiO2	Al2O3	Cr2O3	Fe2O3	FeO	CaO	MgO	MnO	Na2O	K2O	TiO2	P2O5	H20PLUS	C	S	Q	C	Or	Ab	An	Ne	Di	Hy	Ol	Mt	Il	Ap	Py	Sum	TOTFe2O3	Fe2O3	FeO	checksum
L1412	10	58.88	20.24	0.004	0.626087	4.17391	3.73	2.16	0.06	5.84	2.5	0.52	0.12	1	<0.02	<0.02	2.026	1.432	14.774	49.416	17.721	0	0	10.758	0	1.044	0.988	0.284	0.019	98.462	4.8	0.626087	4.17391	0.15
L1414A	10	69.1	17.4	<0.01	0.193043	1.28696	2.34	0.9	0.02	6.2	1.43	0.14	0.04	0.84	0.04	<0.02	20.564	1.494	8.451	52.463	11.348	0	0	3.921	0	0.319	0.266	0.095	0.019	98.938	1.48	0.193043	1.28696	0.15
L1414B	10	66.8	18	<0.01	0.280435	1.86957	2.3	1.29	0.03	6.34	1.94	0.29	0.13	0.89	<0.02	0.04	14.999	1.6	11.465	53.647	10.561	0	0	5.455	0	0.464	0.551	0.308	0.075	99.125	2.15	0.280435	1.86957	0.15
L1453	1	51.2	12.5	0.06	2.3087	15.3913	8.06	3.35	0.22	2.35	2.29	1.54	0.15	0.68	0.19	0.09	0.78	0	13.533	19.885	16.795		19.019	22.635	0	3.35	2.926	0.355	0.169	99.447	17.7	2.3087	15.3913	0.15
L1458A	2	60.88	11.94	0.145	1.66826	11.1217	1.23	9.85	0.24	1.74	0.25	0.75	0.02	0	0.02	<0.02	25.457	6.618	1.477	14.723	5.972	0	0	40.099	0	2.784	1.425	0.047	0.019	98.622	12.79	1.66826	11.1217	0.15
L1487	2	54.94	16.91	0.007	0.970435	6.46957	6.23	4.54	0.09	3.63	1.49	0.89	0.36	3.1	0.12	0.26	6.197	0	8.805	30.716	25.445	0	2.542	17.752	0	1.624	1.691	0.853	0.487	96.114	7.44	0.970435	6.46957	0.15
L1488	10	70.9	15.9	<0.01	0.195652	1.30435	2.07	0.86	0.02	5.47	2.19	0.26	0.08	0.88	<0.02	<0.02	24.53	0.959	12.942	46.286	9.747	0	0	3.651	0	0.334	0.494	0.189	0.019	99.15	1.5	0.195652	1.30435	0.15
L1489	10	66.7	17.7	<0.01	0.340435	2.26957	1.98	1.4	0.02	5.52	2.3	0.45	0.12	1.48	<0.02	<0.02	18.61	2.817	13.592	46.709	9.039	0	0	6.112	0	0.566	0.855	0.284	0.019	98.602	2.61	0.340435	2.26957	0.15
L1490	1	44.9	11.3	<0.01	2.89565	19.3043	9.04	4.64	0.31	1.79	0.93	3.13	0.3	0.66	<0.02	0.29	0	0	5.496	15.146	20.051	0	19.342	24.35	0.481	4.829	5.947	0.711	0.544	96.897	22.2	2.89565	19.3043	0.15
L1491	10	69.57	16.64	<0.002	0.256957	1.71304	2.56	0.55	0.03	5.69	1.66	0.26	0.06	0.9	<0.02	<0.02	23.021	0.972	9.81	48.147	12.309	0	0	3.501	0	0.435	0.494	0.142	0.019	98.849	1.97	0.256957	1.71304	0.15
L1492	3	57.1	19.8	0.04	0.653478	4.35652	1.17	2.4	0.03	0.75	11.1	0.73	0.12	1.71	1.21	<0.02	2.127	4.711	65.598	6.346	5.021	0	0	11.222	0	1.088	1.387	0.284	0.019	97.802	5.01	0.653478	4.35652	0.15
L1493	10	74.7	14.4	<0.01	0.0821739	0.547826	1.34	0.12	0.02	4.7	3.62	0.05	0.01	0.22	0.02	<0.02	30.156	0.337	21.393	39.77	6.583	0	0	1.04	0	0.131	0.095	0.024	0.019	99.547	0.63	0.0821739	0.547826	0.15
FeO estimated from total Fe as Fe203, assuming Fe2O3/FeO = 0.15
